# Supplementary figures and images for: Genomic Regions Associated with Fusarium Wilt Resistance in Flax
Source: MDPI journal article supplement (doi:10.3390/ijms222212383), 2021-11-17

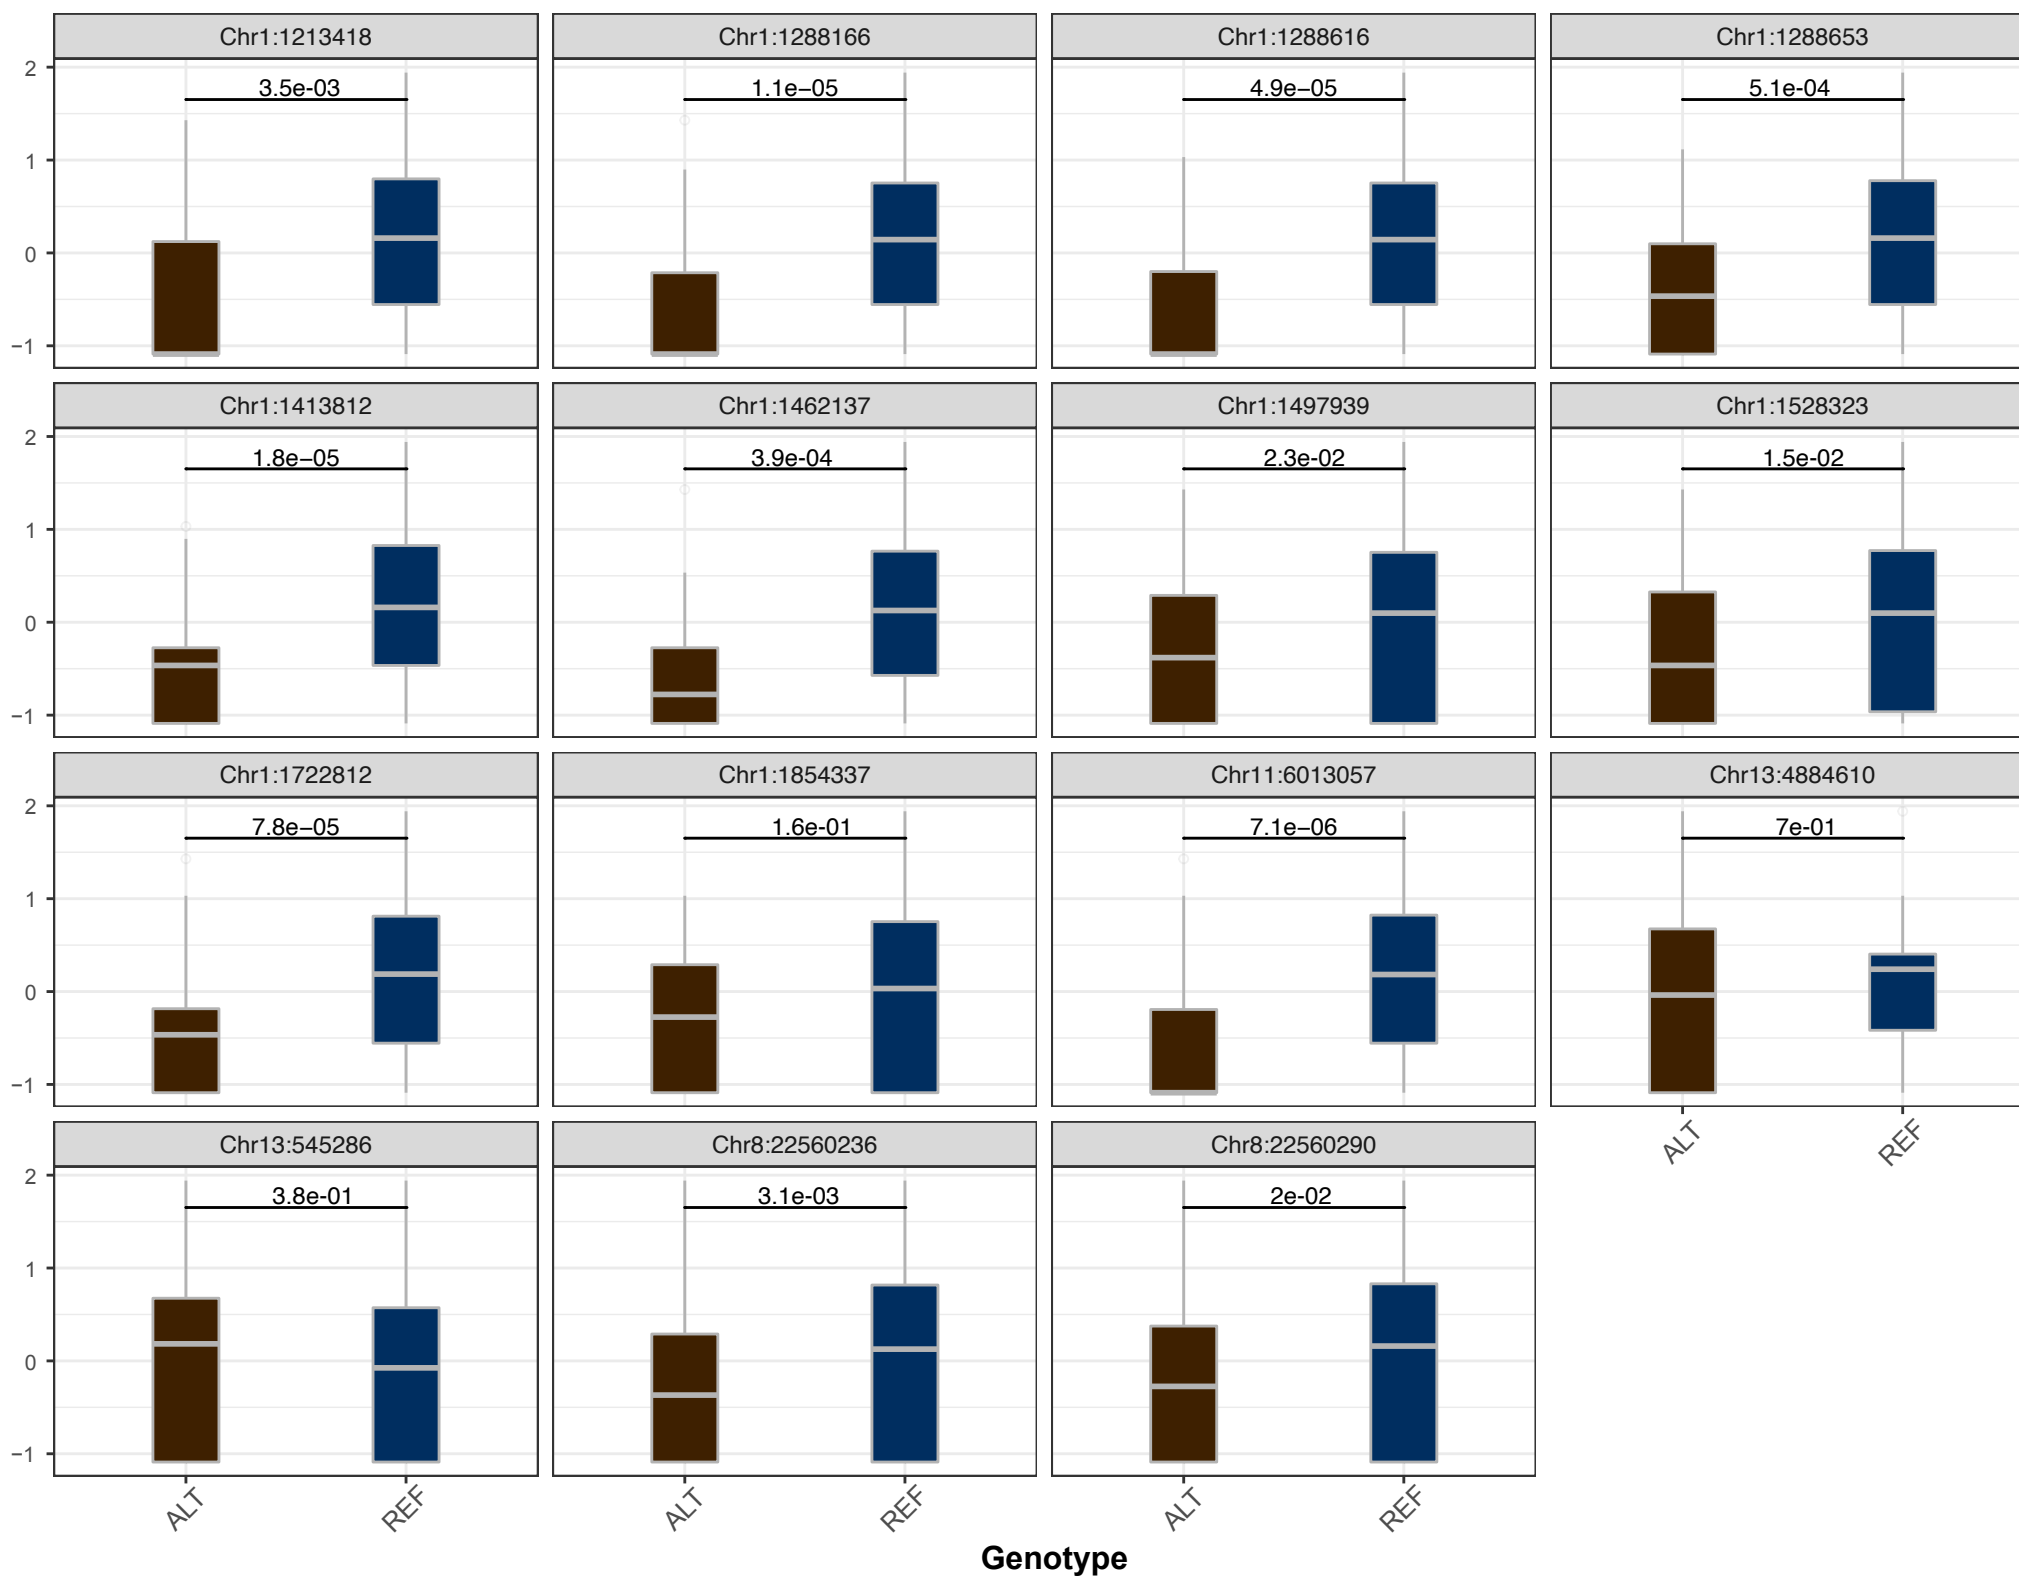

Supplement: s1 [file s1]

Q-normalized DSI 2020

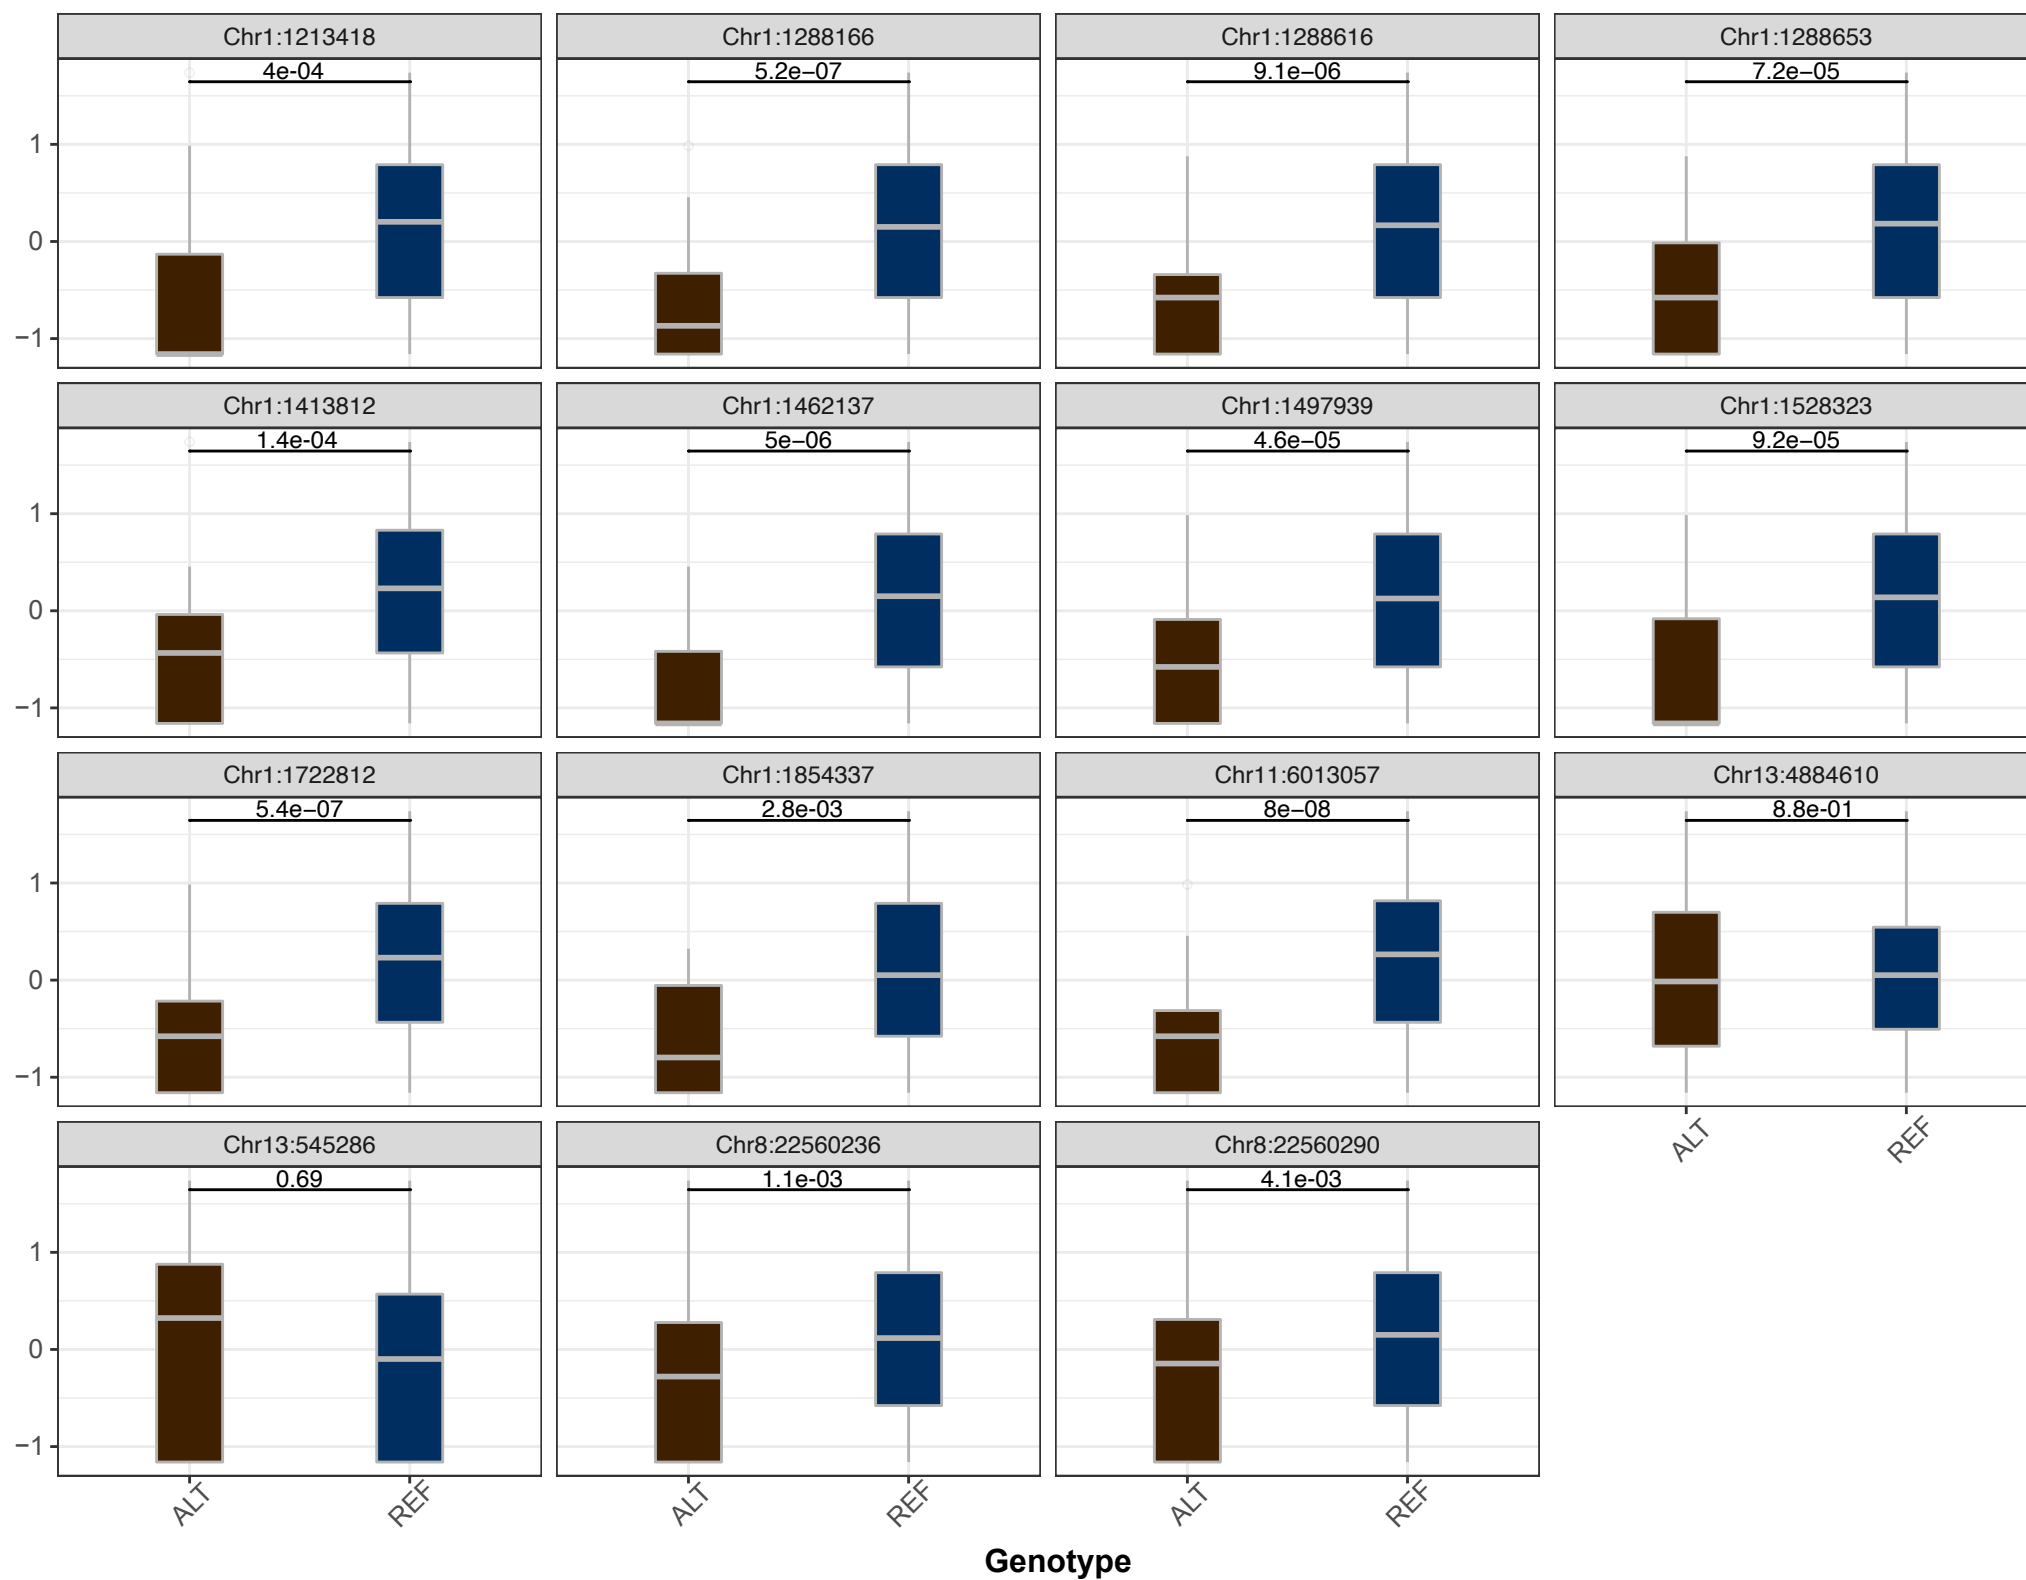

Supplement: s1 [file s1]
